# Supplementary material for: Synthesis of N-heterocyclic carbene rhenium(i) carbonyl complexes
Source: Royal Society of Chemistry journal article supplement (doi:10.1039/c2dt11974a), 2012-01-01
Supplement: c2dt11974a.pdf [file c2dt11974a.pdf]

## Synthesis and Property of *N*-Heterocyclic Carbene Rhenium(I) Carbonyl Complexes

Chang-Hung Chen, Yi-Hong Liu, Shie-Ming Peng, Jwu-Ting Chen, Shiuh-Tzung Liu\*

Supplementary

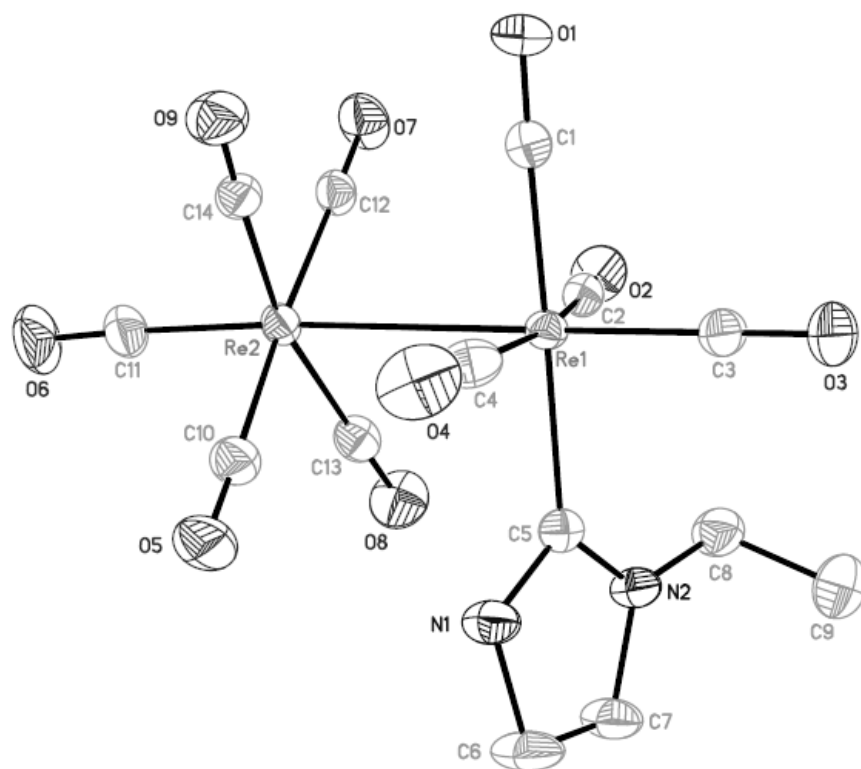

Figure S1 ORTEP Plot of **3b** (Drawn with 30 % probability ellipsoids)

Table S1. Bond lengths [Å] and angles [°] for **3b**.

|                   |             |                   |            |
|-------------------|-------------|-------------------|------------|
| Re(1)-C(3)        | 1.913(3)    | O(4)-C(4)         | 1.141(4)   |
| Re(1)-C(1)        | 1.967(4)    | O(5)-C(10)        | 1.132(4)   |
| Re(1)-C(4)        | 1.975(4)    | O(6)-C(11)        | 1.153(4)   |
| Re(1)-C(2)        | 1.979(4)    | O(7)-C(12)        | 1.132(4)   |
| Re(1)-C(5)        | 2.183(3)    | O(8)-C(13)        | 1.130(4)   |
| Re(1)-Re(2)       | 3.06893(19) | O(9)-C(14)        | 1.125(4)   |
| Re(2)-C(11)       | 1.924(4)    | N(1)-C(5)         | 1.338(4)   |
| Re(2)-C(10)       | 1.973(4)    | N(1)-C(6)         | 1.452(5)   |
| Re(2)-C(13)       | 1.984(4)    | N(2)-C(5)         | 1.331(4)   |
| Re(2)-C(14)       | 1.990(4)    | N(2)-C(8)         | 1.468(4)   |
| Re(2)-C(12)       | 1.996(4)    | N(2)-C(7)         | 1.465(4)   |
| O(1)-C(1)         | 1.137(4)    | C(6)-C(7)         | 1.508(5)   |
| O(2)-C(2)         | 1.139(4)    | C(8)-C(9)         | 1.493(5)   |
| O(3)-C(3)         | 1.151(4)    |                   |            |
| C(3)-Re(1)-C(1)   | 93.03(15)   | C(13)-Re(2)-C(14) | 166.18(14) |
| C(3)-Re(1)-C(4)   | 93.46(16)   | C(11)-Re(2)-C(12) | 94.10(15)  |
| C(1)-Re(1)-C(4)   | 89.39(14)   | C(10)-Re(2)-C(12) | 174.11(14) |
| C(3)-Re(1)-C(2)   | 96.86(15)   | C(13)-Re(2)-C(12) | 90.49(14)  |
| C(1)-Re(1)-C(2)   | 88.48(14)   | C(14)-Re(2)-C(12) | 88.30(14)  |
| C(4)-Re(1)-C(2)   | 169.56(14)  | C(11)-Re(2)-Re(1) | 176.15(13) |
| C(3)-Re(1)-C(5)   | 87.99(13)   | C(10)-Re(2)-Re(1) | 86.75(11)  |
| C(1)-Re(1)-C(5)   | 178.93(12)  | C(13)-Re(2)-Re(1) | 80.62(10)  |
| C(4)-Re(1)-C(5)   | 90.22(13)   | C(14)-Re(2)-Re(1) | 85.58(10)  |
| C(2)-Re(1)-C(5)   | 91.72(13)   | C(12)-Re(2)-Re(1) | 87.85(9)   |
| C(3)-Re(1)-Re(2)  | 179.30(11)  | C(5)-N(1)-C(6)    | 114.5(3)   |
| C(1)-Re(1)-Re(2)  | 86.47(10)   | C(5)-N(2)-C(8)    | 127.7(3)   |
| C(4)-Re(1)-Re(2)  | 86.05(11)   | C(5)-N(2)-C(7)    | 113.5(3)   |
| C(2)-Re(1)-Re(2)  | 83.62(9)    | C(8)-N(2)-C(7)    | 118.3(3)   |
| C(5)-Re(1)-Re(2)  | 92.51(8)    | O(1)-C(1)-Re(1)   | 178.0(3)   |
| C(11)-Re(2)-C(10) | 91.43(16)   | O(2)-C(2)-Re(1)   | 177.4(3)   |
| C(11)-Re(2)-C(13) | 96.03(17)   | O(3)-C(3)-Re(1)   | 179.6(4)   |
| C(10)-Re(2)-C(13) | 90.94(15)   | O(4)-C(4)-Re(1)   | 177.9(3)   |
| C(11)-Re(2)-C(14) | 97.79(16)   | N(1)-C(5)-N(2)    | 106.0(3)   |
| C(10)-Re(2)-C(14) | 88.95(14)   | N(1)-C(5)-Re(1)   | 123.8(2)   |

|                  |          |                  |          |
|------------------|----------|------------------|----------|
| N(2)-C(5)-Re(1)  | 130.2(2) | O(6)-C(11)-Re(2) | 178.2(4) |
| N(1)-C(6)-C(7)   | 101.2(3) | O(7)-C(12)-Re(2) | 178.7(3) |
| N(2)-C(7)-C(6)   | 102.1(3) | O(8)-C(13)-Re(2) | 179.1(3) |
| N(2)-C(8)-C(9)   | 113.7(4) | O(9)-C(14)-Re(2) | 177.6(3) |
| O(5)-C(10)-Re(2) | 178.6(3) |                  |          |

---

Symmetry transformations used to generate equivalent atoms:
